# Supplementary material for: Quantifying the Effects of Combination Trastuzumab and Radiation Therapy in Human Epidermal Growth Factor Receptor 2-Positive Breast Cancer
Source: MDPI journal article supplement (doi:10.3390/cancers14174234), 2022-08-31
Supplement: s1 [file s1]

Supplementary Materials

# Quantifying the effects of combination trastuzumab and radiation therapy in human epidermal growth factor receptor 2 positive breast cancer

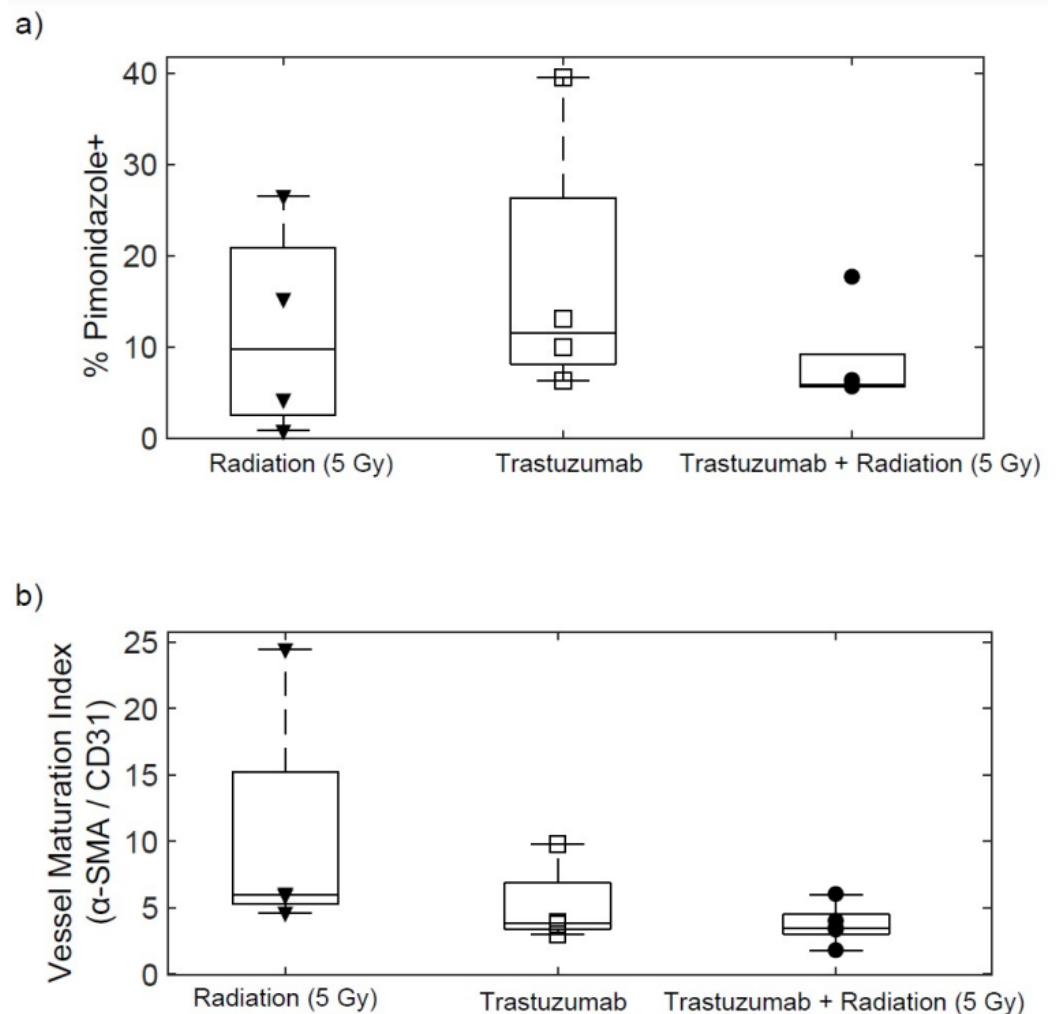

**Supplementary Figure S1:** Hypoxia and vascular staining in single agent radiation, trastuzumab and combination treated tumors. All radiation single agent and combination groups were treated with 5 Gy of radiation on Day 0. All trastuzumab single agent and combination groups were treated with 10 mg/kg of trastuzumab on Days 0 and 3. a) Percent pimonidazole staining revealing no significant differences between treatment groups ( $P > 0.05$ ). B) Vascular maturation index revealing no significant differences between treatment groups ( $P > 0.05$ ).

# A. HER2

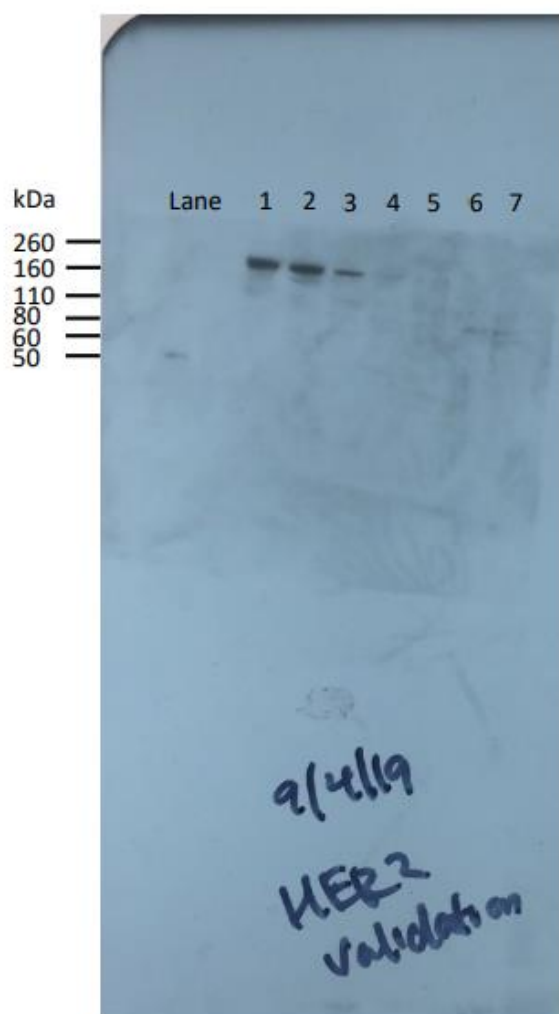

# B. $\beta$ -Actin

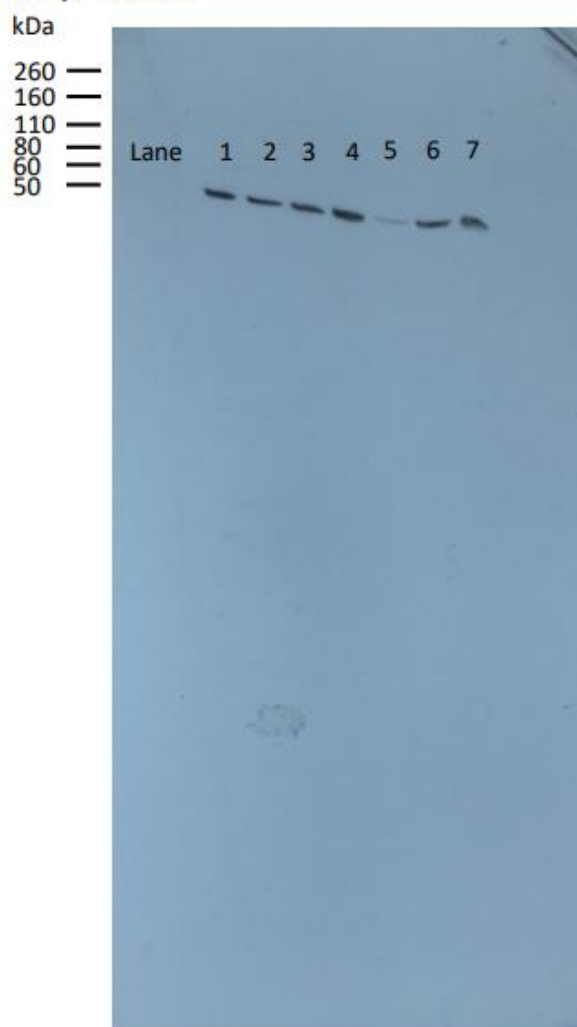

Supplementary Figure S2. Uncropped blots shown in Figure 2a of the manuscript.
